# Supplementary material for: A low-dimensional molecular spin system with two steps of magnetic transitions and liquid crystal property
Source: Royal Society of Chemistry journal article supplement (doi:10.1039/c0dt01704c), 2011-01-01
Supplement: c0dt01704c.pdf [file c0dt01704c.pdf]

## ESI

### **A low-dimensional molecular spin system with two steps of magnetic transitions and liquid crystal property**

Hai-Bao Duan<sup>†</sup> Xiao-Ming Ren<sup>†#\*</sup> Lin-Jiang Shen<sup>†</sup> Wan-Qin Jin<sup>†</sup> Qing-Jin Meng<sup>#</sup>  
Zheng-Fang Tian<sup>†</sup> Shi-Ming Zhou<sup>‡\*</sup>

<sup>†</sup> State Key Laboratory of Materials-Oriented Chemical Engineering and College of Science, Nanjing University of Technology, Nanjing 210009, P.R. China

<sup>#</sup> State Key Laboratory & Coordination Chemistry Institute, Nanjing University, Nanjing 210093, P. R. China

<sup>‡</sup> Hefei National Laboratory for Physical Sciences at Microscale, University of Science and Technology of China, Hefei, Anhui 230026, P. R. China

Tel.: +86-25-83587820

Fax: +86-25-83587438

E-mail: [xmren@njut.edu.cn](mailto:xmren@njut.edu.cn); [zhousm@ustc.edu.cn](mailto:zhousm@ustc.edu.cn)

**Table S1:** Crystallographic and refinement Data for the tapped phase at 293 K

|                                   |                        |
|-----------------------------------|------------------------|
| Molecular formula                 | $C_{13}H_{19}N_6NiS_4$ |
| Molecular mass                    | 446.30                 |
| crystal system                    | monoclinic             |
| Space group                       | P2(1)/m                |
| a/Å                               | 4.4980(3)              |
| b/Å                               | 20.5770(14)            |
| c/Å                               | 13.6962(9)             |
| $\alpha^\circ$                    | 90                     |
| $\beta^\circ$                     | 96.193(6)              |
| $\gamma^\circ$                    | 90                     |
| V/Å <sup>3</sup> / Z              | 1260.24(15) / 2        |
| $\mu/\text{mm}^{-1}$              | 4.263                  |
| F(000)                            | 462                    |
| $\rho/\text{g cm}^{-3}$           | 1.176                  |
| R <sub>1</sub>                    | 0.1989                 |
| wR <sub>2</sub>                   | 0.5476                 |
| Goodness of fit on F <sup>2</sup> | 2.427                  |

**Table S2:** Crystallographic and refinement Data for **1** at 293 K and 105 K

| Complex                           | <b>1</b> at 293 K      | <b>1</b> at 105 K      |
|-----------------------------------|------------------------|------------------------|
| Molecular formula                 | $C_{19}H_{19}N_6NiS_4$ | $C_{19}H_{19}N_6NiS_4$ |
| Molecular mass                    | 518.37                 | 518.37                 |
| crystal system                    | Triclinic              | Triclinic              |
| Space group                       | P -1                   | P -1                   |
| a/Å                               | 4.5025(6)              | 4.4540(5)              |
| b/Å                               | 13.6474(13)            | 13.6238(15)            |
| c/Å                               | 20.5060(19)            | 20.238(2)              |
| $\alpha^\circ$                    | 84.901(8)              | 84.472(9)              |
| $\beta^\circ$                     | 85.132(9)              | 85.962(8)              |
| $\gamma^\circ$                    | 83.759(9)              | 82.683(9)              |
| V/Å <sup>3</sup> / Z              | 1244.0(2) / 2          | 1210.3(2) / 2          |
| $\mu/\text{mm}^{-1}$              | 4.405                  | 4.528                  |
| F(000)                            | 534.0                  | 532.0                  |
| $\rho/\text{g cm}^{-3}$           | 1.384                  | 1.422                  |
| R <sub>1</sub>                    | 0.0472                 | 0.0441                 |
| wR <sub>2</sub>                   | 0.1678                 | 0.1397                 |
| Goodness of fit on F <sup>2</sup> | 1.127                  | 1.227                  |

**Table S3:** Selected Bond Lengths (Å) and Bond Angles (°) for **1** at 293 K and 105 K

| <b>1</b> at 293 K |           |                  |           |
|-------------------|-----------|------------------|-----------|
| Ni(1)-S(1)        | 2.134(1)  | Ni(2)-S(3)       | 2.136(1)  |
| Ni(1)-S(2)        | 2.147(1)  | Ni(2)-S(4)       | 2.151(1)  |
| S(1)-Ni(1)-S(1A)  | 180.00(1) | S(3)-Ni(2)-S(3A) | 180.00(6) |
| S(1)-Ni(1)-S(2)   | 87.58(5)  | S(3)-Ni(1)-S(4A) | 92.56(5)  |
| S(1A)-Ni(1)-S(2)  | 92.42(5)  | S(3)-Ni(1)-S(4)  | 87.44(5)  |
| <b>1</b> at 105 K |           |                  |           |
| Ni(1)-S(1)        | 2.138(1)  | Ni(2)-S(3)       | 2.143(1)  |
| Ni(1)-S(2)        | 2.152(1)  | Ni(2)-S(4)       | 2.155(1)  |
| S(1)-Ni(1)-S(1A)* | 180.00(6) | S(3)-Ni(2)-S(3A) | 180.00(5) |
| S(1)-Ni(1)-S(2)   | 87.23(5)  | S(3)-Ni(1)-S(4A) | 92.69(5)  |
| S(1A)-Ni(1)-S(2)  | 92.77(5)  | S(3)-Ni(1)-S(4)  | 87.31(5)  |

Symmetric code: A = 1-x, 1-y, 1-z

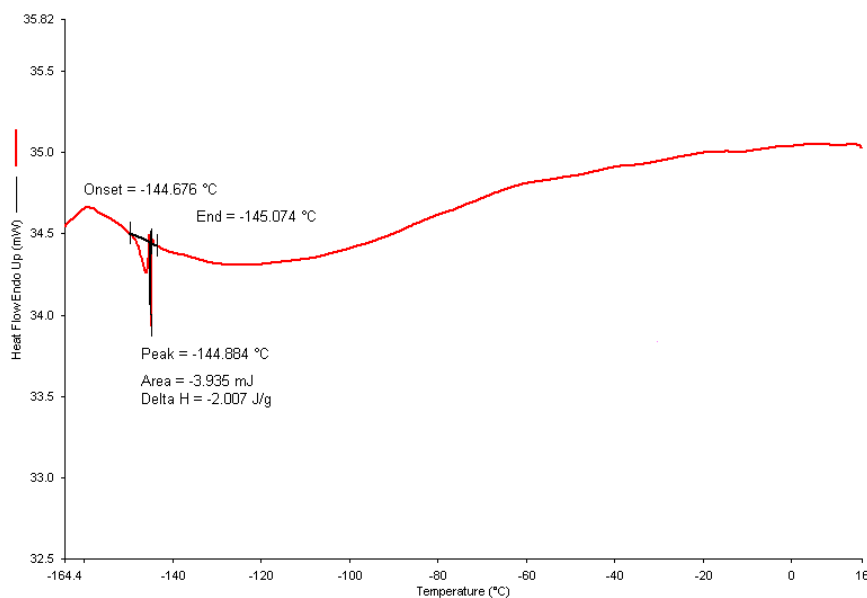

Figure S1 DSC plot of as-prepared sample of **1** measured from -164 to 16 °C shows an enthalpy change corresponding to the magnetic transition in low-temperature region ( $T_C \approx 128.5$  K).

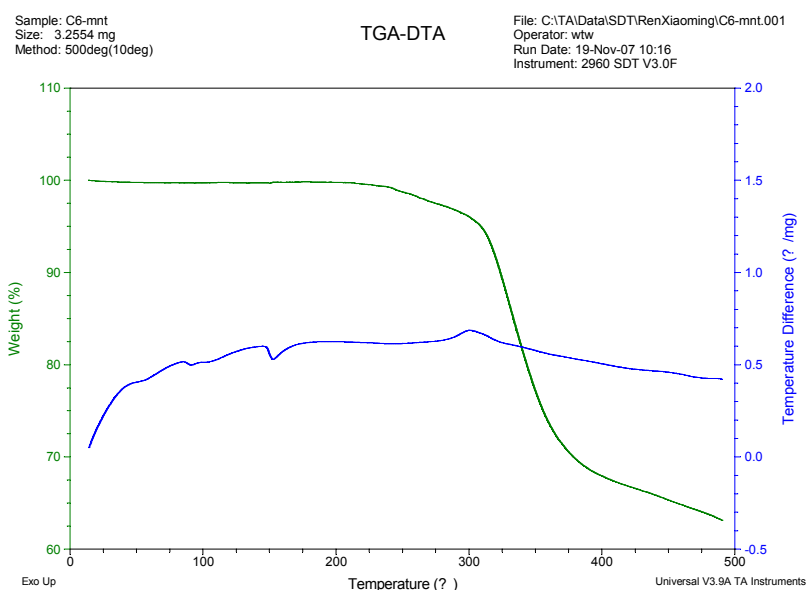

Figure S2 TGA and DTA curves for as-prepared sample of **1** (the measurements were performed under  $N_2$  atmosphere) in 20-500 °C range disclosed that **1** is thermally stable below 237 °C; the weight losing is about 5% in 237-307 °C and 32% in 307-500 °C ranges.

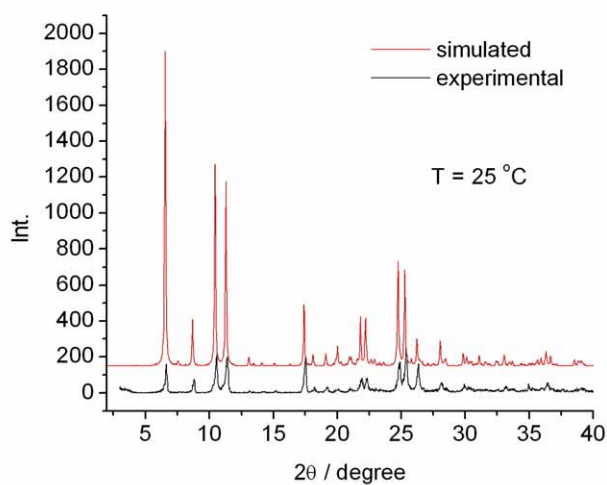

Figure S3 Powder X-ray diffraction patterns at 25 °C (experimental and simulated profiles) for as-prepared sample of **1** which confirms the phase purity of the as-prepared sample.

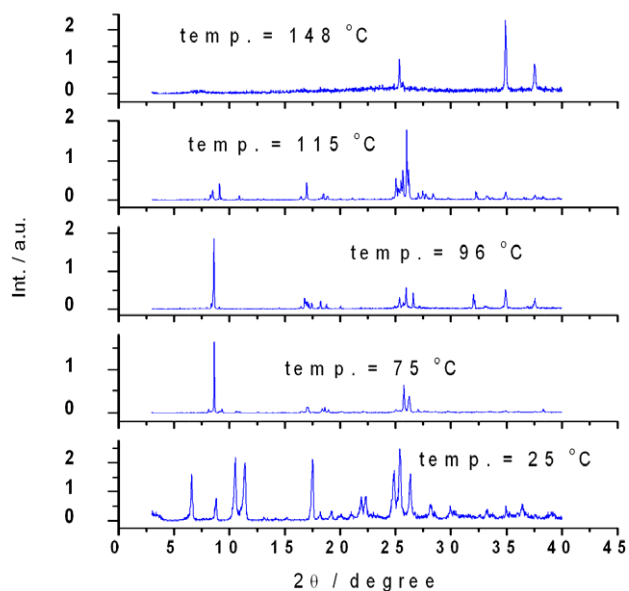

Figure S4 PXRD patterns were measured from 25 (crystal) to 148 °C (mesophase) in the 2θ range of 3-40° for **1**.

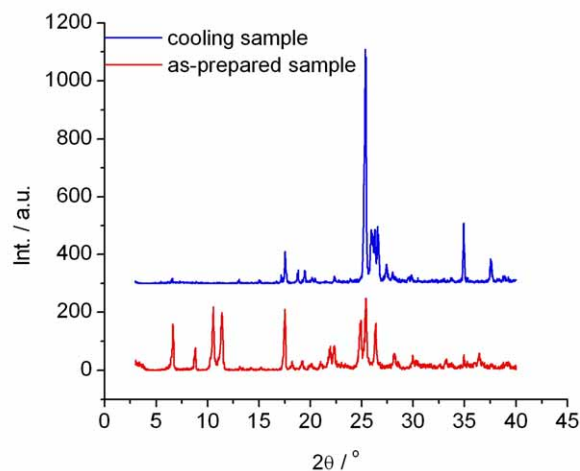

Figure S5 PXR D profiles measured for the as-prepared sample and the cooling sample after melted at  $25^\circ\text{C}$  in the  $2\theta$  range of  $3\text{--}40^\circ$  for **1**, which show different patterns.

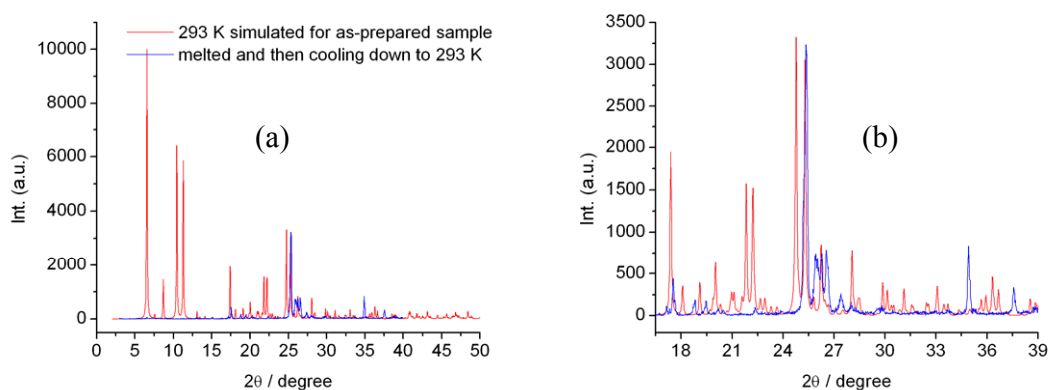

Figure S6 PXR D profiles (Figure b is an enlarged one of Figure a), in which the red line represents the simulated PXR D pattern for the as-prepared sample of **1** from the single crystal data at 293 K and the blue line is the experimental PXR D pattern for the sample that is melted and then cooling down to  $25^\circ\text{C}$  for **1**. From Figure b, the somewhat difference are observed between two patterns although they are similar to each other.

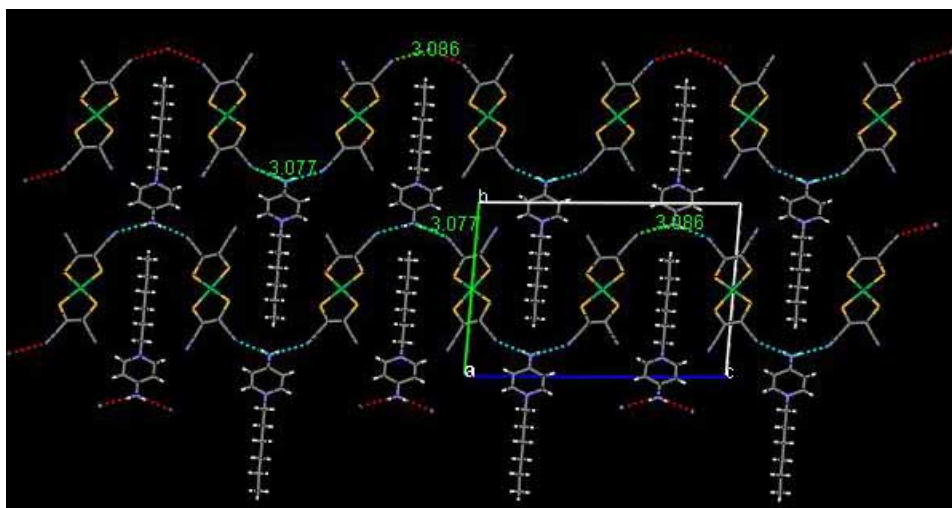

Figure S7 H-bonding sheet which is parallel to bc-plane (projected along a-axis) at 25 °C for as-prepared sample.

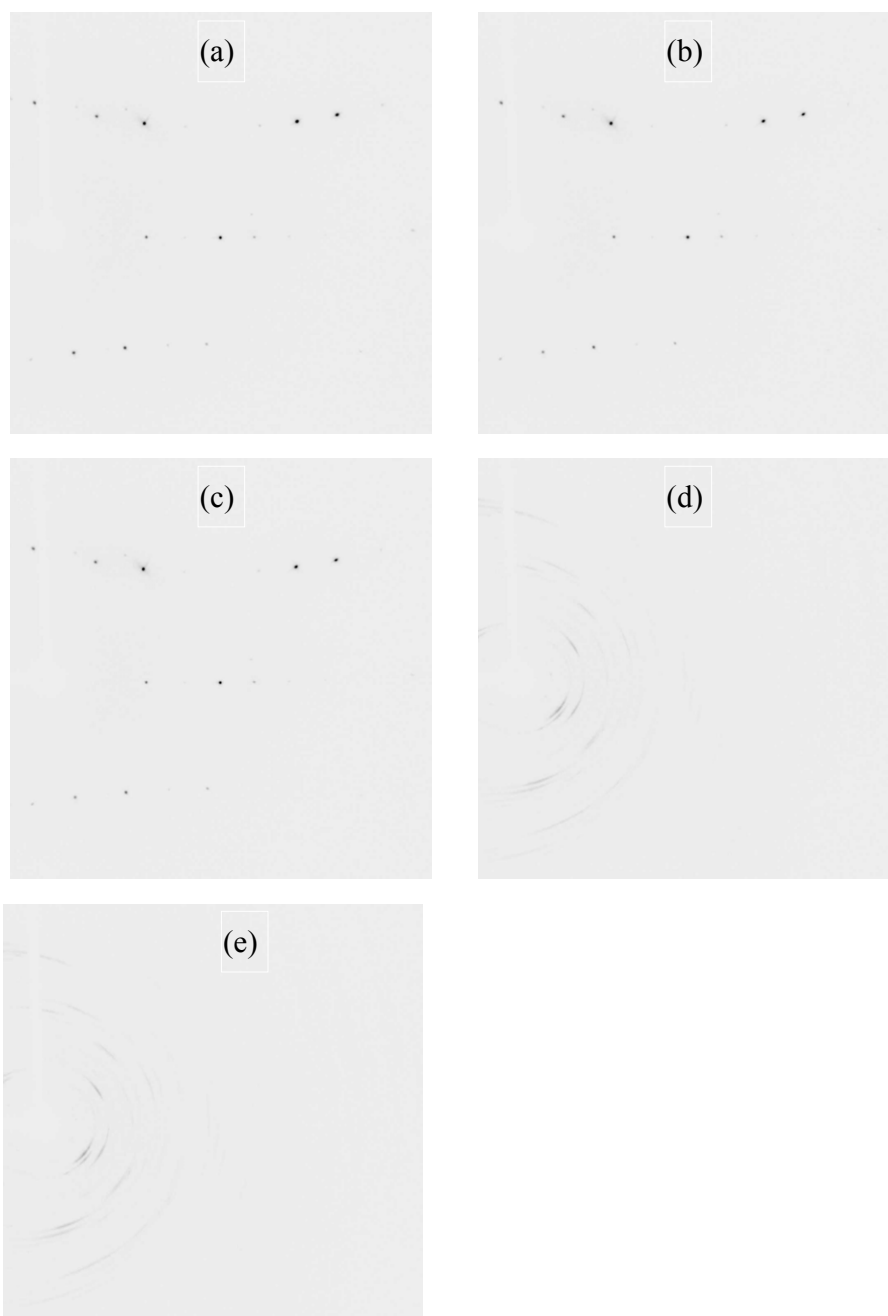

**Figure S8** Diffractions change with temperature measured at (a) 320 K (b) 330 K (c) 345 K (d) 355 K and (e) 320 K after cooling.



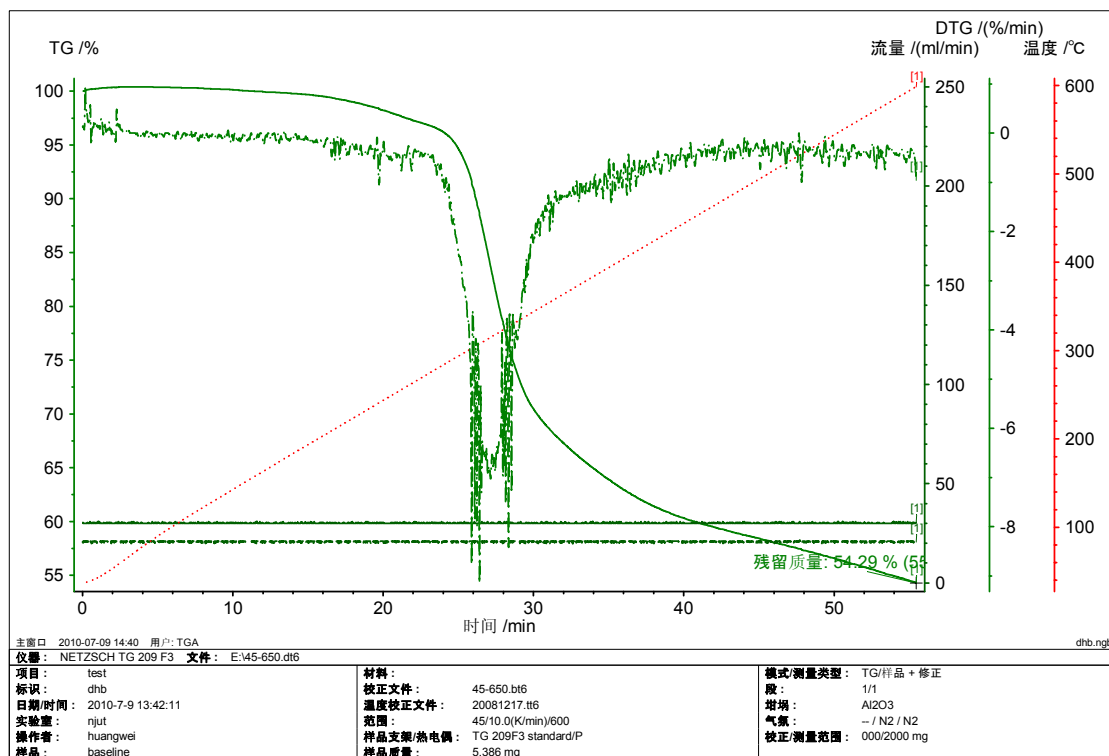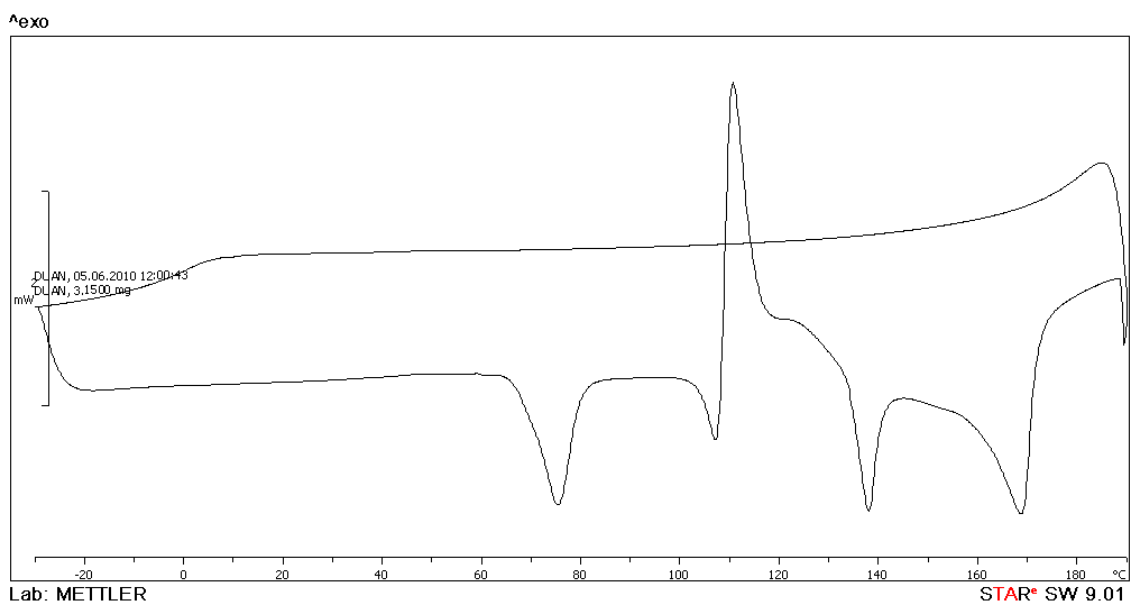

Figure S9 TG and DSC profile of  $[C_6-APy][Cu(mnt)_2]$ .

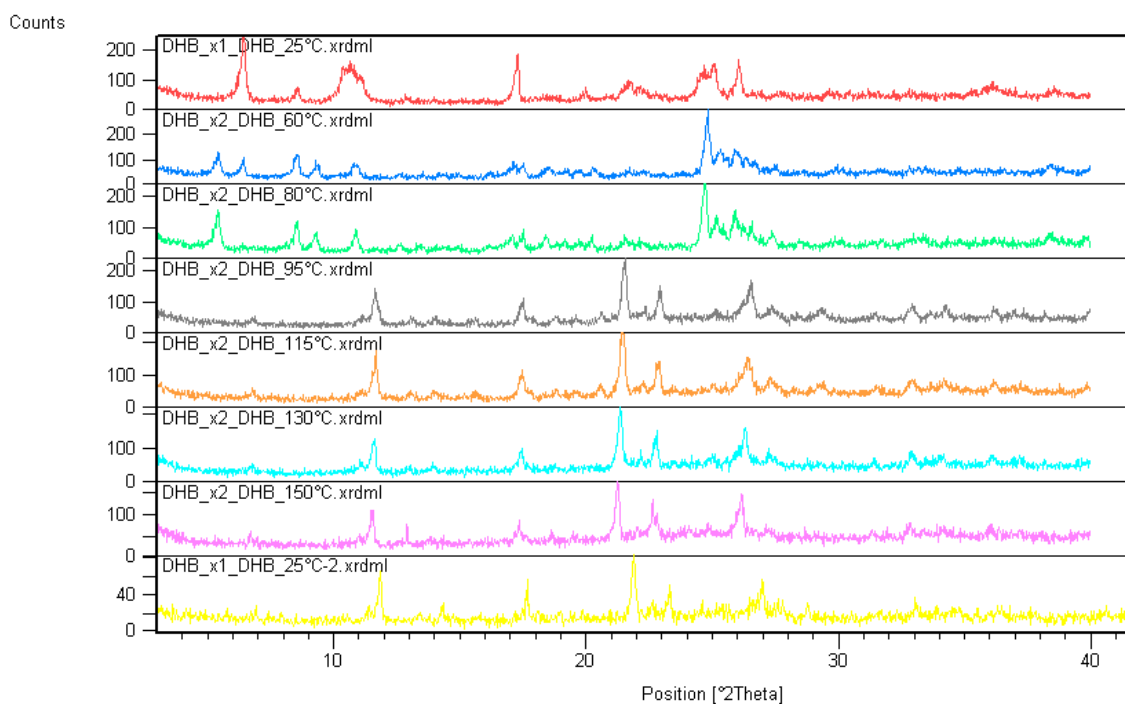

**Figure S10** Temperature dependent PXRD for  $[C_6-APy][Cu(mnt)_2]$  (the measurements in sequence of 25 °C → 60 → 80 → 95 → 115 → 130 → 150 → 25 °C).

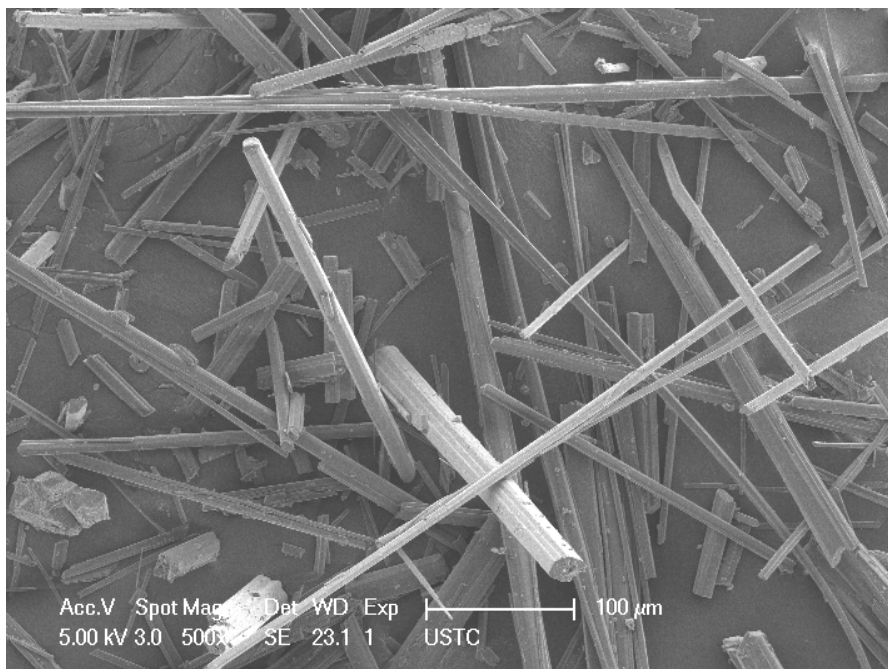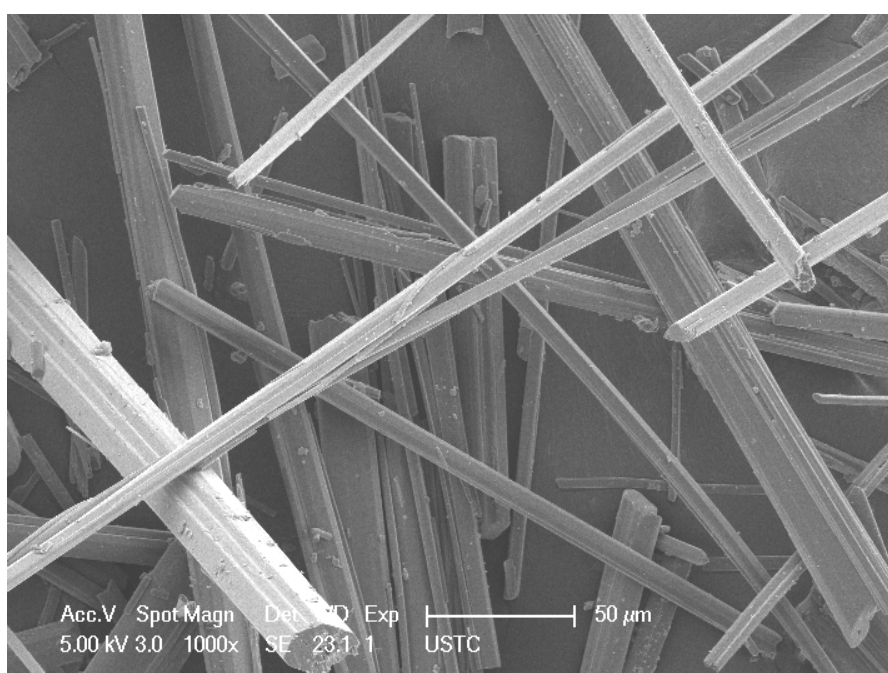

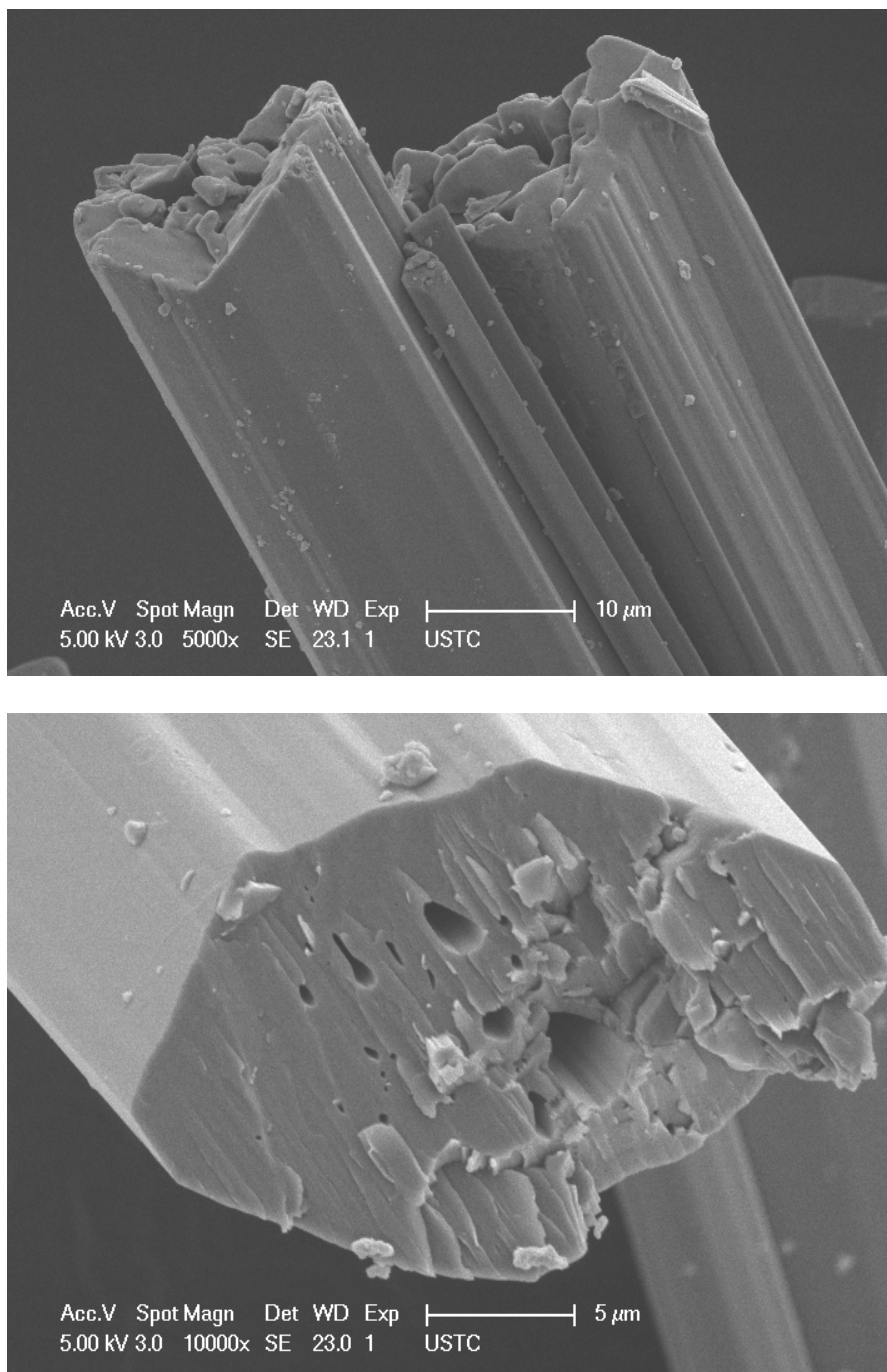

Figure S11 SEM micrographs of  $[C_6-APy][Cu(mnt)_2]$ .
